# Supplementary material
Source: ML conference proceedings conference paper supplement (https://proceedings.neurips.cc/paper_files/paper/2018/hash/dbb240d23ce3d732b67bcfbae5956b18-Abstract.html)
Supplement: Supplementary file [file dbb240d23ce3d732b67bcfbae5956b18-Supplemental.zip]

---

# Appendix for “Mean Field for the Stochastic Blockmodel: Optimization Landscape and Convergence Issues”

---

**Soumendu Sunder Mukherjee\***

Interdisciplinary Statistical Research Unit (ISRU)  
Indian Statistical Institute, Kolkata  
Kolkata 700108, India  
soumendu041@gmail.com

**Purnamrita Sarkar\***

Department of Statistics and Data Science  
University of Texas, Austin  
Austin, TX 78712  
purna.sarkar@austin.utexas.edu

**Y. X. Rachel Wang\***

School of Mathematics and Statistics  
University of Sydney  
NSW 2006, Australia  
rachel.wang@sydney.edu.au

**Bowei Yan**

Department of Statistics and Data Science  
University of Texas, Austin  
Austin, TX 78712  
bowei@utexas.edu

## Abstract

This supplementary article contains an appendix to our paper “Mean Field for the Stochastic Blockmodel: Optimization Landscape and Convergence Issues”, providing derivation of stationarity equations for the mean field log-likelihood and the proofs of our main results.

## 1 The Variational principle and mean field

We start with the following simple observation:

$$\begin{aligned}\log P(A; B, \pi) &= \log \sum_Z P(A, Z; B, \pi) = \log \left( \sum_Z \frac{P(A, Z; B, \pi)}{\psi(Z)} \psi(Z) \right) \\ &\stackrel{(\text{Jensen})}{\geq} \sum_Z \log \left( \frac{P(A, Z; B, \pi)}{\psi(Z)} \right) \psi(Z) \quad \forall \psi \text{ prob. on } \mathcal{Z}.\end{aligned}$$

In fact, equality holds for  $\psi^*(Z) = P(Z|A; B, \pi)$ . Therefore, if  $\Psi$  denotes the set of all probability measures on  $\mathcal{Z}$ , then

$$\log P(A; B, \pi) = \max_{\psi \in \Psi} \sum_Z \log \left( \frac{P(A, Z; B, \pi)}{\psi(Z)} \right) \psi(Z). \quad (\text{A.1})$$

The crucial idea from variational inference is to replace the set  $\Psi$  above by some easy-to-deal-with subclass  $\Psi_0$  to get a lower bound on the log-likelihood.

$$\log P(A; B, \pi) \geq \max_{\psi \in \Psi_0} \sum_Z \log \left( \frac{P(A, Z; B, \pi)}{\psi(Z)} \right) \psi(Z). \quad (\text{A.2})$$

Also the optimal  $\psi_* \in \Psi_0$  is a potential candidate for an estimate of  $P(Z|A; B, \pi)$ . Estimating  $P(Z|A; B, \pi)$  is profitable since then we can obtain an estimate of the community membership

---

\*Equal contribution.

matrix by setting  $Z_{ia} = 1$  for the  $i$ th agent where

$$a = \arg \max_b P(Z_{ib} = 1 | A; B, \pi). \quad (\text{A.3})$$

The goal now has become optimizing the lower bound in (A.2).

## 2 Derivation of stationarity equations

$$\begin{aligned} \frac{\partial \ell}{\partial \psi_i} &= 4t \sum_{j:j \neq i} (\psi_j - \frac{1}{2})(A_{ij} - \lambda) - \log \left( \frac{\psi_i}{1 - \psi_i} \right), \\ \frac{\partial \ell}{\partial p} &= \frac{1}{2} \sum_{i,j:i \neq j} (\psi_i \psi_j + (1 - \psi_i)(1 - \psi_j)) \left( A_{ij} \left( \frac{1}{p} + \frac{1}{1-p} \right) - \frac{1}{1-p} \right), \\ \frac{\partial \ell}{\partial q} &= \frac{1}{2} \sum_{i,j:i \neq j} (\psi_i(1 - \psi_j) + (1 - \psi_i)\psi_j) \left( A_{ij} \left( \frac{1}{q} + \frac{1}{1-q} \right) - \frac{1}{1-q} \right). \end{aligned} \quad (\text{A.4})$$

Therefore

$$\begin{aligned} \frac{\partial^2 \ell}{\partial \psi_j \partial \psi_i} &= 4t(A_{ij} - \lambda)(1 - \delta_{ij}) - \frac{1}{\psi_i(1 - \psi_i)} \delta_{ij}, \\ \frac{\partial^2 \ell}{\partial \psi_i \partial p} &= \frac{1}{2} \sum_{j:j \neq i} \left( \frac{1}{2} - \psi_j \right) \left( A_{ij} \left( \frac{1}{p} + \frac{1}{1-p} \right) - \frac{1}{1-p} \right), \\ \frac{\partial^2 \ell}{\partial \psi_i \partial q} &= \frac{1}{2} \sum_{j:j \neq i} \left( \psi_i - \frac{1}{2} \right) \left( A_{ij} \left( \frac{1}{q} + \frac{1}{1-q} \right) - \frac{1}{1-q} \right), \\ \frac{\partial^2 \ell}{\partial p^2} &= \frac{1}{2} \sum_{i,j:i \neq j} (\psi_i \psi_j + (1 - \psi_i)(1 - \psi_j)) \left( A_{ij} \left( -\frac{1}{p^2} + \frac{1}{(1-p)^2} \right) - \frac{1}{(1-p)^2} \right), \\ \frac{\partial^2 \ell}{\partial q^2} &= \frac{1}{2} \sum_{i,j:i \neq j} (\psi_i(1 - \psi_j) + (1 - \psi_i)\psi_j) \left( A_{ij} \left( -\frac{1}{q^2} + \frac{1}{(1-q)^2} \right) - \frac{1}{(1-q)^2} \right), \\ \frac{\partial^2 \ell}{\partial q \partial p} &= 0. \end{aligned} \quad (\text{A.5})$$

## 3 Proofs of main results

*Proof of Proposition 3.1.* For any  $a > b > 0$ , we have

$$\frac{a-b}{a} < \log \left( \frac{a}{b} \right) < \frac{a-b}{b},$$

which can be proved using the inequality  $\log(1+x) < x$  for  $x > -1, x \neq 0$ . Therefore

$$\frac{p-q}{p} < \log \left( \frac{p}{q} \right) < \frac{p-q}{q}, \quad \text{and} \quad \frac{p-q}{1-q} < \log \left( \frac{1-q}{1-p} \right) < \frac{p-q}{1-p}.$$

So

$$\frac{(p-q)(1+p-q)}{2(1-q)p} < t = \frac{1}{2} \left( \log \left( \frac{p}{q} \right) + \log \left( \frac{1-q}{1-p} \right) \right) < \frac{(p-q)(1-p+q)}{2(1-p)q},$$

and

$$q = \frac{\frac{p-q}{1-q}}{\frac{p-q}{q} + \frac{p-q}{1-q}} < \lambda = \frac{\log(\frac{1-q}{1-p})}{\log(\frac{p}{q}) + \log(\frac{1-q}{1-p})} < \frac{\frac{p-q}{1-p}}{\frac{p-q}{p} + \frac{p-q}{1-p}} = p.$$

This completes the proof.  $\square$

### 3.1 Proofs of results in Section 3.1

*Proof of Proposition 3.2.* That  $\psi = \frac{1}{2}\mathbf{1}$  is a stationary point is obvious from the stationarity equations (A.4). The eigenvalues of  $-4I + 4tM$ , the Hessian at  $\frac{1}{2}\mathbf{1}$ , are  $h_i = -4 + 4t\nu_i$ . We have  $\nu_1 = n\alpha_+ - (p - \lambda) = \Theta(n)$ , and hence so is  $h_1$ . Also,  $p - \bar{\lambda} > 0$ , so that  $\nu_3 < 0$ , and hence  $h_3 < 0$ . Thus we have two eigenvalues of the opposite sign.  $\square$

*Proof of Theorem 3.3.* From (5), we have

$$\psi_i^{(s+1)} = g(na_{\sigma_i}^{(s)} + b_i^{(s)}) = g(na_{\sigma_i}^{(s)}) + \delta_i^{(s)},$$

where  $|\delta_i^{(s)}| = O(\exp(-n|a_{\sigma_i}^{(s)}|))$ , where we have used the fact that

$$g(nx + y) - g(nx) = g(nx)g(nx + y)(e^y - 1)\exp(-(nx + y)).$$

Writing as a vector, we have

$$\psi^{(s+1)} = g(na_{+1}^{(s)})\mathbf{1}_{C_1} + g(na_{-1}^{(s)})\mathbf{1}_{C_2} + \delta^{(s)}, \quad (\text{A.6})$$

where  $\|\delta^{(s)}\|_\infty = \max_i |\delta_i^{(s)}| = O(\exp(-n \min\{|a_{+1}^{(s)}|, |a_{-1}^{(s)}|\}))$ . Note that by our assumption,  $\|\delta^{(0)}\|_\infty = O(\exp(-n \min\{|a_{+1}^{(0)}|, |a_{-1}^{(0)}|\})) = o(1)$ . Now

$$\zeta_1^{(s+1)} = \frac{\langle \psi^{(s+1)}, u_1 \rangle}{n} = \frac{g(na_{+1}^{(s)}) + g(na_{-1}^{(s)})}{2} + O(\|\delta^{(s)}\|_\infty),$$

and

$$\zeta_2^{(s+1)} = \frac{\langle \psi^{(s+1)}, u_2 \rangle}{n} = \frac{g(na_{+1}^{(s)}) - g(na_{-1}^{(s)})}{2} + O(\|\delta^{(s)}\|_\infty).$$

Note that  $g(na_{\pm 1}^{(s)}) = \mathbf{1}_{\{a_{\pm 1}^{(s)} > 0\}} + O(\|\delta^{(s)}\|_\infty)$ . Now, using (A.6), we have

$$\begin{aligned} & \frac{\|\psi^{(s+1)} - \ell(\psi^{(0)})\|_2^2}{n} \\ &= \frac{\|(g(na_{+1}^{(s)}) - \mathbf{1}_{\{a_{+1}^{(0)} > 0\}})\mathbf{1}_{C_1} + (g(na_{-1}^{(s)}) - \mathbf{1}_{\{a_{-1}^{(0)} > 0\}})\mathbf{1}_{C_2} + \delta^{(s)}\|^2}{n} \\ &\leq \frac{2(\|(g(na_{+1}^{(s)}) - \mathbf{1}_{\{a_{+1}^{(0)} > 0\}})\mathbf{1}_{C_1}\|_2^2 + \|(g(na_{-1}^{(s)}) - \mathbf{1}_{\{a_{-1}^{(0)} > 0\}})\mathbf{1}_{C_2}\|_2^2 + \|\delta^{(s)}\|^2)}{n} \\ &\leq |g(na_{+1}^{(s)}) - \mathbf{1}_{\{a_{+1}^{(0)} > 0\}}|^2 + |g(na_{-1}^{(s)}) - \mathbf{1}_{\{a_{-1}^{(0)} > 0\}}|^2 + 2\|\delta^{(s)}\|_\infty^2 \\ &= |\mathbf{1}_{\{a_{+1}^{(s)} > 0\}} - \mathbf{1}_{\{a_{+1}^{(0)} > 0\}}|^2 + |\mathbf{1}_{\{a_{-1}^{(s)} > 0\}} - \mathbf{1}_{\{a_{-1}^{(0)} > 0\}}|^2 + O(\|\delta^{(s)}\|_\infty^2). \end{aligned} \quad (\text{A.7})$$

From the above representation and our assumption on  $n|a_{\pm 1}^{(0)}|$ , the bound for  $s = 1$  follows. We will now consider the four different cases of different signs of  $a_{\pm 1}^{(s)}$ .

**Case 1:**  $a_1^{(s)} > 0, a_{-1}^{(s)} > 0$ . In this case  $g(na_1^{(s)}) = g(na_{-1}^{(s)}) = 1 + O(\|\delta^{(s)}\|_\infty)$ , so that

$$(\zeta_1^{(s+1)}, \zeta_2^{(s+1)}) = (1, 0) + O(\|\delta^{(s)}\|_\infty).$$

This implies that

$$a_{\pm 1}^{(s+1)} = 2t\alpha_+ + O(\|\delta^{(s)}\|_\infty).$$

If  $\alpha_+ > 0$ ,  $a_{\pm 1}^{(s+1)}$  have the same sign as  $a_{\pm 1}^{(s)}$ . Otherwise, if  $\alpha_+ < 0$ , both of them become negative (and we thus have to go to Case 2 below). Note that, here and in the subsequent cases, we are using that fact that  $\|\delta^{(s)}\|_\infty = o(1)$ , for  $s = 0$ , by our assumption and it stays the same for  $s \geq 1$  because of relations like the above (that is  $a_{\pm 1}^{(1)} = -2t\alpha_+ + o(1)$ , so that  $\|\delta^{(1)}\|_\infty = \exp(-n \min\{|a_{+1}^{(1)}|, |a_{-1}^{(1)}|\}) = O(\exp(-Cnt\alpha_+)) = o(1)$ , and so on).

**Case 2:**  $a_1^{(s)} < 0, a_{-1}^{(s)} < 0$ . In this case  $1 - g(na_1^{(s)}) = 1 - g(na_{-1}^{(s)}) = 1 + O(\|\delta^{(s)}\|_\infty)$ , so that

$$(\zeta_1^{(s+1)}, \zeta_2^{(s+1)}) = (0, 0) + O(\|\delta^{(s)}\|_\infty).$$

This implies that

$$a_{\pm 1}^{(s+1)} = -2t\alpha_+ + O(\|\delta^{(s)}\|_\infty).$$

If  $\alpha_+ > 0$ ,  $a_{\pm 1}^{(s+1)}$  have the same sign as  $a_{\pm 1}^{(s)}$ . Otherwise, if  $\alpha_+ < 0$ , both of them become positive (and we thus have to go to Case 1 above).

**Case 3:**  $a_1^{(s)} > 0, a_{-1}^{(s)} < 0$ . In this case  $g(na_1^{(s)}) = 1 - g(na_{-1}^{(s)}) = 1 + O(\|\delta^{(s)}\|_\infty)$ , so that

$$(\zeta_1^{(s+1)}, \zeta_2^{(s+1)}) = \left(\frac{1}{2}, \frac{1}{2}\right) + O(\|\delta^{(s)}\|_\infty).$$

This implies that

$$a_{\pm 1}^{(s+1)} = \pm 2t\alpha_- + O(\|\delta^{(s)}\|_\infty).$$

Since  $\alpha_- > 0$ ,  $a_{\pm 1}^{(s+1)}$  have the same sign as  $a_{\pm 1}^{(s)}$ .

**Case 4:**  $a_1^{(s)} < 0, a_{-1}^{(s)} > 0$ . In this case  $1 - g(na_1^{(s)}) = g(na_{-1}^{(s)}) = 1 + O(\|\delta^{(s)}\|_\infty)$ , so that

$$(\zeta_1^{(s+1)}, \zeta_2^{(s+1)}) = \left(\frac{1}{2}, -\frac{1}{2}\right) + O(\|\delta^{(s)}\|_\infty).$$

This implies that

$$a_{\pm 1}^{(s+1)} = \mp 2t\alpha_- + O(\|\delta^{(s)}\|_\infty).$$

Since  $\alpha_- > 0$ ,  $a_{\pm 1}^{(s+1)}$  have the same sign as  $a_{\pm 1}^{(s)}$ .

Note that, in the case  $\alpha_+ = 0$ ,  $a_{\pm 1}^{(s)} = \pm 4t\zeta_2^{(s)}\alpha_-$ , so that  $a_{\pm 1}^{(s)}$  have opposite signs and we land in Cases 3 or 4.

We conclude that, if  $\alpha_+ \geq 0$ , then we stay in the same case where we began, and otherwise if  $\alpha_+ < 0$  we have a cycling behavior between Cases 1 and 2. Now the desired conclusion follows from the bound (A.7).

In the proof above, we can allow sparser graphs, with  $p, q \gg \frac{1}{n}$ . More explicitly, let  $p = \rho_n a$ ,  $q = \rho_n b$ , with  $a > b > 0$  and  $\rho_n \gg \frac{1}{n}$ . Then,  $t = \Omega(1)$ , and  $\alpha_+ \leq p - q = \rho_n(a - b)$ ,  $\alpha_- = (p - q)/2 = \rho_n(a - b)/2$ . So, we do have  $nt|\alpha_\pm| \rightarrow \infty$ .  $\square$

*Proof of Theorem 3.4.* We begin by noting that  $\widehat{M} - M = A - \mathbb{E}(A|Z) := A - \tilde{P}$ . For the first iteration, we rewrite the sample iterations (7) as

$$\begin{aligned} \hat{\xi}^{(1)} &= 4tM\left(\psi^{(0)} - \frac{1}{2}\mathbf{1}\right) + 4t(\widehat{M} - M)\left(\psi^{(0)} - \frac{1}{2}\mathbf{1}\right) \\ &= \xi^{(1)} + \underbrace{4t(A - \tilde{P})\left(\psi^{(0)} - \frac{1}{2}\mathbf{1}\right)}_{=: nr^{(0)}}. \end{aligned}$$

Therefore, similar to the population case, we have

$$\hat{\psi}_i^{(1)} = g(na_{\sigma_i}^{(0)} + b_i^{(0)} + nr_i^{(0)}).$$

Note that

$$r_i^{(0)} = \frac{4t}{n} \sum_{j \neq i} (A_{ij} - \tilde{P}_{ij}|Z_i, Z_j)(\psi_j^{(0)} - \frac{1}{2}). \quad (\text{A.8})$$

Assume that  $\psi^{(0)}$  is independent of  $A$ . Since our probability statements will be with respect to the randomness in  $A$ , we may assume that  $\psi^{(0)}$  is fixed. Let  $Y_{ij} = (A_{ij} - \tilde{P}_{ij})(\psi_j^{(0)} - \frac{1}{2})$ . Then

the  $Y_{ij}$  are independent random variables for  $j \neq i$ , and  $\mathbb{E}(Y_{ij}) = 0$ . Also,  $|Y_{ij}| \leq |\psi_j^{(0)} - \frac{1}{2}| \leq \|\psi^{(0)} - \frac{1}{2}\|_\infty = \Delta$ , say, and  $\mathbb{E}Y_{ij}^2 = (\psi_j^{(0)} - \frac{1}{2})^2 \text{Var}(A_{ij}) = O(\rho_n(\psi_j^{(0)} - \frac{1}{2})^2)$ . So, by Bernstein's inequality,

$$\begin{aligned} \mathbb{P}\left(\frac{1}{n} \sum_{j \neq i} Y_{ij} > \epsilon\right) &\leq \exp\left(\frac{-\frac{1}{2}n^2\epsilon^2}{\sum_{j \neq i} \mathbb{E}Y_{ij}^2 + \frac{1}{3}\Delta n\epsilon}\right) \\ &\leq \exp\left(\frac{-\frac{1}{2}n^2\epsilon^2}{C\rho_n\|\psi^{(0)} - \frac{1}{2}\|_2^2 + \frac{1}{3}\Delta n\epsilon}\right) \\ &\leq \exp\left(\frac{-\frac{1}{2}n^2\epsilon^2}{Cn\rho_n\Delta^2 + \frac{1}{3}\Delta n\epsilon}\right). \end{aligned} \quad (\text{A.9})$$

It follows from here that  $nr_i^{(0)} = O(\sqrt{n\rho_n}\Delta \log n)$  with high probability, if  $\sqrt{n\rho_n} = \Omega(\log n)$ . In fact, by taking a suitably large constant in the big “Oh”, we can show, via a union bound, that  $\max_i nr_i^{(0)} = O(\sqrt{n\rho_n}\Delta \log n)$  with high probability.

Now, from our assumption  $n|a_{\pm 1}^{(0)}| \gg \max\{\sqrt{n\rho_n}\|\psi^{(0)} - \frac{1}{2}\|_\infty \log n, 1\}$ , it follows that  $na_{\sigma_i}^{(0)} \gg nr_i^{(0)} + b_i^{(0)}$  with high probability, simultaneously for all  $i$ . Thus, similar to the population case, we can write

$$\hat{\psi}^{(1)} = g(na_{+1}^{(0)})\mathbf{1}_{C_1} + g(na_{-1}^{(0)})\mathbf{1}_{C_2} + \hat{\delta}^{(0)},$$

where  $\|\hat{\delta}^{(0)}\|_\infty = O(\exp(-n \min\{|a_{+1}^{(0)}|, |a_{-1}^{(0)}|\})) = o(1)$ , with high probability. After this the proof proceeds like the the proof of Theorem 3.3, and so we omit it.

Let us consider the case with  $s = 2$  and we will show  $nr_i^{(1)}$  can be bounded in a general way. Now

$$\begin{aligned} \xi^{(2)} &= 4t(A - \lambda(J - I))(\hat{\psi}^{(1)} - 1/2) \\ &= 4tM(\hat{\psi}^{(1)} - 1/2) + nr^{(1)} \\ &= 4tM(\hat{\psi}^{(1)} - 1/2) + \underbrace{4t(A - \tilde{P})(\hat{\psi}^{(1)} - \ell(\psi^{(0)}))}_{R_1} + \underbrace{4t(A - \tilde{P})(\ell(\psi^{(0)}) - \frac{1}{2}\mathbf{1})}_{R_2}. \end{aligned}$$

Now the analysis of the first term follows from Theorem 3.3. It is also easy to see  $\max_i |R_{2,i}| = O_P(\sqrt{n\rho_n})$ , since  $\ell(\psi^{(0)}) \in \{\mathbf{1}_{C_1}, \mathbf{1}_{C_2}, \mathbf{1}, \mathbf{0}, \frac{1}{2}\mathbf{1}\}$ . For  $R_1$ ,

$$\begin{aligned} \max_i |R_{1,i}| &\leq \|R_1\|_2 \leq \|A - \tilde{P}\|_{op} \|\hat{\psi}^{(1)} - \tilde{\ell}(\psi^{(0)})\|_2 \\ &= O_P(\sqrt{n\rho_n})\sqrt{n} \cdot O(\exp(-\Theta(n \min\{|a_{+1}^{(0)}|, |a_{-1}^{(0)}|\}))) = o_P(1), \end{aligned}$$

under our assumption that  $n|a_{\pm 1}^{(0)}| \gg \max\{\sqrt{n\rho_n}\|\psi^{(0)} - \frac{1}{2}\|_\infty \log n, 1\}$ . Hence  $\max_i |nr_i^{(1)}| = O_P(\sqrt{n\rho_n})$ , and  $na_{\sigma_i}^{(1)} \gg nr_i^{(1)} + b_i^{(1)}$  with high probability, simultaneously for all  $i$ . The same analysis as in the  $s = 1$  case follows.

The case for general  $s$  can be proved by induction using the same decomposition of  $nr^{(s)}$ , replacing  $\ell(\psi^{(0)})$  with a more general  $\tilde{\ell}(\psi^{(0)}) \in \{\ell(\psi^{(0)}), \mathbf{0}, \mathbf{1}\}$  depending on the signs of  $a_{+1}^{(0)}, a_{-1}^{(0)}, \alpha_+$  as described in Theorem 3.3 for  $s \geq 2$ .  $\square$

*Proof of Corollary 3.5.* From Theorem 3.3, it follows that, when  $\alpha_+ > 0$ ,

$$\begin{aligned} \mathfrak{M}(\mathcal{S}_1) &\geq \mathfrak{M}(\{\psi^{(0)} \mid a_{+1}^{(0)} > 0, a_{-1}^{(0)} > 0, na_{\pm 1}^{(0)} \gg 1\}) \\ &= \mathfrak{M}(\{\psi^{(0)} \mid a_{+1}^{(0)} \gg \frac{1}{n}, a_{-1}^{(0)} \gg \frac{1}{n}\}) \\ &\geq \mathfrak{M}(\{\psi^{(0)} \mid a_{+1}^{(0)} > \frac{1}{n^\gamma}, a_{-1}^{(0)} > \frac{1}{n^\gamma}\}), \end{aligned}$$

for any  $0 < \gamma < 1$  and so on for the other limit points.

More explicitly,

$$\begin{aligned} \{\psi^{(0)} \mid a_{+1}^{(0)} > \frac{1}{n^\gamma}, a_{-1}^{(0)} > \frac{1}{n^\gamma}\} &= \{\psi^{(0)} \mid (\zeta_1^{(0)} - \frac{1}{2})\alpha_+ + \zeta_2^{(0)}\alpha_- > \frac{1}{4tn^\gamma}, \\ &\quad (\zeta_1^{(0)} - \frac{1}{2})\alpha_+ - \zeta_2^{(0)}\alpha_- > \frac{1}{4tn^\gamma}\} \\ &= H_+^\gamma \cap H_-^\gamma \cap [0, 1]^n, \end{aligned}$$

All in all, we have

$$\mathfrak{M}(\mathcal{S}_1) \geq \lim_{\gamma \uparrow 1} \mathfrak{M}(H_+^\gamma \cap H_-^\gamma \cap [0, 1]^n).$$

This completes the proof.  $\square$

### 3.2 Proofs of results in Section 3.2

*Proof of Proposition 3.6.* That the described point is a stationary point is easy to verify, because of the presence of the  $(\psi_i - \frac{1}{2})$  terms in the stationarity equations (A.4). Now, from (A.5), we see that the Hessian matrix at  $(\frac{1}{2}\mathbf{1}, \frac{\mathbf{1}^\top A\mathbf{1}}{n(n-1)}, \frac{\mathbf{1}^\top A\mathbf{1}}{n(n-1)}, \frac{1}{2})$  is given by

$$H = \begin{pmatrix} -4I & \mathbf{0} & \mathbf{0} \\ \mathbf{0}^\top & -\frac{n(n-1)}{4\hat{a}(1-\hat{a})} & 0 \\ \mathbf{0}^\top & 0 & -\frac{n(n-1)}{4\hat{a}(1-\hat{a})} \end{pmatrix},$$

where  $\hat{a} = \frac{\mathbf{1}^\top A\mathbf{1}}{n(n-1)}$ . Clearly,  $H$  is negative definite. This completes the proof.  $\square$

*Proof of Lemma 3.1.* First note that conditioning on the true labels  $Z$ ,  $\mathbb{E}(A|Z) = \tilde{P}$ . For the update of  $p^{(1)}$ , we have

$$\begin{aligned} p^{(1)} &= \frac{\psi^T \tilde{P} \psi + (\mathbf{1} - \psi)^T \tilde{P} (\mathbf{1} - \psi)}{\psi^T (J - I) \psi + (\mathbf{1} - \psi)^T (J - I) (\mathbf{1} - \psi)} \\ &\quad + \frac{\psi^T (A - \tilde{P}) \psi + (\mathbf{1} - \psi)^T (A - \tilde{P}) (\mathbf{1} - \psi)}{\psi^T (J - I) \psi + (\mathbf{1} - \psi)^T (J - I) (\mathbf{1} - \psi)}, \end{aligned}$$

where the first term can be written as

$$\begin{aligned} &\frac{\psi^T (\frac{p+q}{2} u_1 u_1^T + \frac{p-q}{2} u_2 u_2^T - pI) \psi + (\mathbf{1} - \psi)^T (\frac{p+q}{2} u_1 u_1^T + \frac{p-q}{2} u_2 u_2^T - pI) (\mathbf{1} - \psi)}{\psi^T (u_1 u_1^T - I) \psi + (\mathbf{1} - \psi)^T (u_1 u_1^T - I) (\mathbf{1} - \psi)} \\ &= \frac{\frac{p+q}{2} n^2 (\zeta_1^2 + (1 - \zeta_1)^2) + n^2 (p - q) \zeta_2^2 - px}{\zeta_1^2 n^2 + (1 - \zeta_1)^2 n^2 - x} \\ &= \frac{p+q}{2} + \frac{(p-q)(\zeta_2^2 - x/2n^2)}{\zeta_1^2 + (1 - \zeta_1)^2 - x/n^2}, \end{aligned}$$

where  $x = \psi^T \psi + (\mathbf{1} - \psi)^T (\mathbf{1} - \psi) \geq n^2/4$ . The second term can be bounded by noting  $\mathbb{E}(\psi^T (A - \tilde{P}) \psi) = 0$  and  $\text{Var}(\psi^T (A - \tilde{P}) \psi) \leq 2n(n-1)p$ . By Chebyshev's inequality,  $\psi^T (A - \tilde{P}) \psi = O_P(\sqrt{\rho n})$ .

This is because

$$\mathbb{E}_{\psi, A}[\psi^T (A - \tilde{P}) \psi] = \mathbb{E}_{\psi} \mathbb{E}_A[\psi^T (A - \tilde{P}) \psi \mid \psi] = 0,$$

and

$$\begin{aligned} \text{Var}_{\psi, A}[\psi^T (A - \tilde{P}) \psi] &= \mathbb{E} \text{Var}(\psi^T (A - \tilde{P}) \psi \mid \psi) + \text{Var}(\mathbb{E}[\psi^T (A - \tilde{P}) \psi \mid \psi]) \\ &= \mathbb{E} \text{Var}(\psi^T (A - \tilde{P}) \psi \mid \psi) \\ &= 4 \mathbb{E} \sum_{i < j} \psi_i \psi_j \text{Var}(A_{ij}) \leq 2n(n-1)p. \end{aligned}$$

$(1 - \psi)^T(A - \tilde{P})(1 - \psi)$  can be handled similarly, and

$$\begin{aligned} & \psi^T(J - I)\psi + (1 - \psi)^T(J - I)(1 - \psi) \\ &= \left(\sum_i \psi_i\right)^2 + \left(n - \sum_i \psi_i\right)^2 - \psi^T\psi - (1 - \psi)^T(1 - \psi) \\ &\geq n^2/2 - 2n, \end{aligned}$$

since the first two terms are minimized at  $\sum_i \psi_i = n/2$ .

The result for  $q^{(1)}$  is proved analogously.  $\square$

*Proof of Proposition 3.7.* Let  $\psi = \zeta_1 u_1 + \zeta_2 u_2 + w$ ,  $w \in \text{span}\{u_1, u_2\}^\perp$ , be a stationary point. We will consider the population version of all the updates and replace  $A$  with  $\mathbb{E}(A|Z) := \tilde{P}$  and  $\rho_n \rightarrow 0$ . By Lemma 3.1,

$$\begin{aligned} \tilde{p} &= \frac{p+q}{2} + \underbrace{\frac{(p-q)(\zeta_2^2 - x/2n^2)}{\zeta_1^2 + (1-\zeta_1)^2 - x/n^2}}_{\epsilon'_1}, \\ \tilde{q} &= \frac{p+q}{2} - \underbrace{\frac{(p-q)(\zeta_2^2 + y/2n^2)}{2\zeta_1(1-\zeta_1) - y/n^2}}_{\epsilon'_2}. \end{aligned} \quad (\text{A.10})$$

In this case, the update equation (4) becomes

$$\begin{aligned} \xi &= 4\tilde{t}(\tilde{P} - \tilde{\lambda}(J - I))(\psi^{(s)} - \frac{1}{2}\mathbf{1}) \\ &= 4\tilde{t}n \left( \left( \zeta_1 - \frac{1}{2} \right) \left( \frac{p+q}{2} - \tilde{\lambda} \right) u_1 + \frac{p-q}{2} \zeta_2 u_2 \right) + 4\tilde{t}(\tilde{\lambda} - p) \left( \psi - \frac{1}{2}\mathbf{1} \right) \\ &:= n\tilde{a} + \tilde{b} \end{aligned} \quad (\text{A.11})$$

where  $\tilde{\lambda}$  and  $\tilde{t}$  are defined in terms of  $\tilde{p}$  and  $\tilde{q}$ . Since  $\psi$  is a stationary point, the above update gives  $\psi = g(\xi)$ .

We consider the following cases.

**Case 1:**  $\zeta_2^2 = \Omega(1)$ . Since  $\zeta_1(1 - \zeta_1) \geq \zeta_2^2$ , it is easy to see that (A.10) implies that  $\tilde{p} > \frac{p+q}{2} > \tilde{q}$ , thus  $\tilde{p} - \tilde{q} = \Omega(\rho_n)$ ,  $\tilde{t} = \Omega(1)$ ,  $\tilde{p} < \tilde{\lambda} < \tilde{q}$ . It follows then  $\tilde{b}_i = O(\rho_n)$ , and  $|\tilde{a}_i| = \Omega(\rho_n)$  for  $i \in \mathcal{C}_1$  or  $i \in \mathcal{C}_2$  (or both). In any of these cases,  $\|w\| = O(\rho_n\sqrt{n}) = o(\sqrt{n})$ .

**Case 2:**  $\zeta_2 = o(1)$ . Note that  $\psi^T(1 - \psi) \geq 0$  implies that  $\zeta_1(1 - \zeta_1) - \frac{\|w\|^2}{n} \geq \zeta_2^2$ . If  $\|w\|^2 = o(n)$ , we are done. If  $\|w\|^2 = \Omega(n)$ ,  $\zeta_1(1 - \zeta_1) = \Omega(1)$ . In this case,  $\tilde{p} = \frac{p+q}{2} + O(\rho_n\zeta_2^2)$ , and similarly for  $\tilde{q}$ . It follows then that  $\tilde{t} = O(\zeta_2^2) = o(1)$ ,  $\tilde{\lambda} = \frac{p+q}{2} + o(\rho_n)$  (we defer the details to (A.14)-(A.18)). Also note that  $\tilde{b}_i = O(\rho_n\zeta_2^2)$ . When  $n|\tilde{a}_i| \gg \tilde{b}_i$ ,  $g(\xi_i) = g(n\tilde{a}_i) + o(1)$ . Since  $g(n\tilde{a}) \in \text{span}\{u_1, u_2\}$ , this implies that  $\|w\| = o(\sqrt{n})$ . When  $n|\tilde{a}_i| \asymp \tilde{b}_i$ ,  $\xi_i = o(1)$ , and so we have  $\|w\| = o(\sqrt{n})$  again.  $\square$

*Proof of Lemma 3.2.* Let  $a = (p+q)/2$ . By (5), define  $\kappa_1 := 4t(\zeta_1 - \frac{1}{2})(a - \lambda)$  and  $\kappa_2 = 4t\zeta_2 \frac{p-q}{2}$ . Consider the initial distribution  $\psi^{(0)}(i) \stackrel{iid}{\sim} f_\mu$ , where  $f$  is a distribution supported on  $(0, 1)$  with mean  $\mu$ . Note that we have the following:

$$\begin{aligned} \zeta_1 &= \frac{\psi^T \mathbf{1}}{n} = \mu + O_P(1/\sqrt{n}), \\ \zeta_2 &= \frac{\psi^T u_2}{n} = O_P(1/\sqrt{n}). \end{aligned} \quad (\text{A.12})$$

Now using (10), recall that

$$\begin{aligned}
p^{(1)} &= \frac{p+q}{2} + \underbrace{\frac{(p-q)(\zeta_2^2 - x/2n^2)}{\zeta_1^2 + (1-\zeta_1)^2 - x/n^2}}_{\epsilon'_1} + O_P(\sqrt{\rho_n}/n), \\
q^{(1)} &= \frac{p+q}{2} - \underbrace{\frac{(p-q)(\zeta_2^2 + y/2n^2)}{2\zeta_1(1-\zeta_1) - y/n^2}}_{\epsilon'_2} - O_P(\sqrt{\rho_n}/n).
\end{aligned} \tag{A.13}$$

This gives

$$\begin{aligned}
\epsilon_1 &= \epsilon'_1 + O_P\left(\frac{\sqrt{\rho_n}}{n}\right) = O_P\left(\frac{\rho_n}{n}\right) + O_P\left(\frac{\sqrt{\rho_n}}{n}\right) = O_P\left(\frac{\sqrt{\rho_n}}{n}\right), \\
\epsilon_2 &= \epsilon'_2 + O_P\left(\frac{\sqrt{\rho_n}}{n}\right) = O_P\left(\frac{\sqrt{\rho_n}}{n}\right).
\end{aligned}$$

We will use the following logarithmic inequalities for  $a > \epsilon > 0$ :

$$\frac{2\epsilon}{a+\epsilon} \leq \log \frac{a+\epsilon}{a-\epsilon} \leq \frac{2\epsilon}{a-\epsilon}. \tag{A.14}$$

Now we have

$$\begin{aligned}
t &= \frac{1}{2} \left( \log \left( \frac{a+\epsilon_1}{a-\epsilon_2} \right) + \log \left( \frac{1-a+\epsilon_2}{1-a-\epsilon_1} \right) \right), \\
2t &\geq \frac{\epsilon_1+\epsilon_2}{a+\epsilon_1} + \frac{\epsilon_1+\epsilon_2}{1-a+\epsilon_2} \geq \frac{(\epsilon_1+\epsilon_2)}{(a+\epsilon_1)(1-a+\epsilon_2)}, \\
2t &\leq \frac{(\epsilon_1+\epsilon_2)}{(a-\epsilon_2)(1-a-\epsilon_1)}.
\end{aligned} \tag{A.15}$$

For  $\lambda$ , if  $\epsilon_1 + \epsilon_2 \geq 0$ , we have

$$\lambda = \frac{\log \frac{1-q^{(1)}}{1-p^{(1)}}}{\log \frac{p^{(1)}}{q^{(1)}} + \log \frac{1-q^{(1)}}{1-p^{(1)}}} \leq \frac{\epsilon_1+\epsilon_2}{1-a-\epsilon_1} \Big/ \left( \frac{\epsilon_1+\epsilon_2}{a+\epsilon_1} + \frac{\epsilon_1+\epsilon_2}{1-a-\epsilon_1} \right) = a + \epsilon_1. \tag{A.16}$$

$$\lambda \geq \frac{\epsilon_1+\epsilon_2}{1-a+\epsilon_2} \Big/ \left( \frac{\epsilon_1+\epsilon_2}{a-\epsilon_2} + \frac{\epsilon_1+\epsilon_2}{1-a+\epsilon_2} \right) = a - \epsilon_2. \tag{A.17}$$

If  $\epsilon_1 + \epsilon_2 \leq 0$ ,

$$\begin{aligned}
\lambda &= \frac{\log \frac{1-q^{(1)}}{1-p^{(1)}}}{\log \frac{p^{(1)}}{q^{(1)}} + \log \frac{1-q^{(1)}}{1-p^{(1)}}} \geq \frac{\epsilon_1+\epsilon_2}{1-a-\epsilon_1} \Big/ \left( \frac{\epsilon_1+\epsilon_2}{a+\epsilon_1} + \frac{\epsilon_1+\epsilon_2}{1-a-\epsilon_1} \right) = a + \epsilon_1, \\
\lambda &\leq \frac{\epsilon_1+\epsilon_2}{1-a+\epsilon_2} \Big/ \left( \frac{\epsilon_1+\epsilon_2}{a-\epsilon_2} + \frac{\epsilon_1+\epsilon_2}{1-a+\epsilon_2} \right) = a - \epsilon_2.
\end{aligned} \tag{A.18}$$

Now we are ready to estimate  $\xi_i$ . We define:

$$\begin{aligned}
\kappa_1 &= 4t(\zeta_1 - \frac{1}{2})(a - \lambda) \leq \left| \frac{2(\epsilon_1+\epsilon_2)}{(a-\epsilon_2)(1-a-\epsilon_1)} \left( \mu - \frac{1}{2} + O_P(1/\sqrt{n}) \right) \max(|\epsilon_1|, |\epsilon_2|) \right| \\
&\leq \frac{4 \max\{\epsilon_1^2, \epsilon_2^2\}}{a(1-a) + O_P(\sqrt{\rho_n}/n)} \left| \mu - \frac{1}{2} + O_P(1/\sqrt{n}) \right| = O_P(1/n^2), \\
\kappa_2 &= 4t\zeta_2 \frac{(p-q)}{2} \leq \left| \frac{2(\epsilon_1+\epsilon_2)}{(a-\epsilon_2)(1-a-\epsilon_1)} (p-q) O_P\left(\frac{1}{\sqrt{n}}\right) \right| \\
&\leq \frac{4 \max(|\epsilon_1|, |\epsilon_2|)}{a(1-a) + O_P(\sqrt{\rho_n}/n)} (p-q) O_P(1/\sqrt{n}) = O_P(\sqrt{\rho_n}/n^{3/2}).
\end{aligned} \tag{A.19}$$



From (5) and adding the noise term from the sample version of the update,

$$\xi_i^{(1)} = n(\kappa_1 + \sigma_i \kappa_2) + b_i^{(0)} + nr_i^{(0)}, \quad (\text{A.20})$$

where  $\max_i |b_i^{(0)}| = t \cdot O_P(\rho_n) = O_P(\sqrt{\rho_n/n})$ , since  $t = O_P(1/(n\sqrt{\rho_n}))$  by (A.15), and  $\max_i |nr_i^{(0)}| = 4t \cdot O_P(\sqrt{n\rho_n} \log n) = O_P(\log n/\sqrt{n})$  if  $n\rho_n \gg (\log n)^2$ , following the bound in Eq (A.9)). Now applying the update for  $\psi$ , we have  $\psi_i^{(1)} = g(\xi_i^{(1)}) = \frac{1}{2} + O_P(\log n/\sqrt{n})$  uniformly for all  $i$ .  $\square$

*Proof of Lemma 3.3.* In this setting, we write  $p^{(1)}, q^{(1)}$  as follows:

$$\begin{aligned} p^{(1)} &= p - (p - q) \frac{\frac{\zeta_1^2 + (1 - \zeta_1)^2}{2} - \zeta_2^2}{\zeta_1^2 + (1 - \zeta_1)^2 - x/n^2} + O_P(\sqrt{\rho_n}/n), \\ q^{(1)} &= q + (p - q) \frac{\zeta_1(1 - \zeta_1) - \zeta_2^2 - y/n^2}{2\zeta_1(1 - \zeta_1) - y/n^2} + O_P(\sqrt{\rho_n}/n). \end{aligned} \quad (\text{A.21})$$

From the proof of Lemma 3.2, Equation A.13, and Equation A.21, we have:  $\epsilon_1, \epsilon_2 < \frac{p+q}{2}$ .

Also note that  $\epsilon_1, \epsilon_2 = \Omega_P(-(p - q)\zeta_2^2 + \sqrt{\rho_n}/n)$ . Hence, by the same argument as in Lemma 3.2,  $|(p + q)/2 - \lambda| \leq \max(|\epsilon_1|, |\epsilon_2|) = \frac{p-q}{2} + O_P(1/n)$  by (A.21).

Finally we see that

$$t = \Theta\left(\frac{\epsilon_1 + \epsilon_2}{\rho_n}\right) = \Theta\left((p - q)\zeta_2^2/\rho_n\right).$$

In addition, condition (13) implies that  $\zeta_2^2 = \Omega_P(1)$ , we see that  $t = \Omega_P(1)$  using (A.15).

Next, using (12) and A.19,

$$\begin{aligned} \kappa_1 + \kappa_2 &= 4t \left( \frac{\mu_1 + \mu_2 - 1}{2} \left( \frac{p+q}{2} - \lambda \right) + \frac{(\mu_1 - \mu_2)(p - q)}{4} + O_P(\rho_n/\sqrt{n}) \right), \\ \kappa_1 - \kappa_2 &= 4t \left( \frac{\mu_1 + \mu_2 - 1}{2} \left( \frac{p+q}{2} - \lambda \right) - \frac{(\mu_1 - \mu_2)(p - q)}{4} + O_P(\rho_n/\sqrt{n}) \right). \end{aligned}$$

In (A.20),  $b_i^{(0)}$  is of smaller order than the other terms and it suffices to consider  $n(\kappa_1 + \sigma_i \kappa_2 + r_i^{(0)})$ . Since  $|r_i^{(0)}| = O_P\left(\sqrt{\frac{\rho_n \log^2 n}{n}}\right)$  (see proof of Theorem 3.4), for any pair  $i \in C_1$  and  $j \in C_2$  we have

$$\begin{aligned} &(\kappa_1 + \kappa_2 + r_i^{(0)})(\kappa_1 - \kappa_2 + r_j^{(0)}) \\ &\leq (\kappa_1^2 - \kappa_2^2) + O\left(\max(|r_i^{(0)}|, |r_j^{(0)}|) \max(|\kappa_1|, |\kappa_2|)\right) \\ &= (\kappa_1^2 - \kappa_2^2) + O_P\left((p - q)\sqrt{\frac{\rho_n \log^2 n}{n}}\right) \\ &= t^2(p - q)^2 \left( (\mu_1 + \mu_2 - 1)^2 - (\mu_1 - \mu_2)^2 + O_P\left(\frac{1}{p - q} \sqrt{\frac{\rho_n \log^2 n}{n}}\right) \right) < 0. \end{aligned}$$

Thus  $n(\kappa_1 + \kappa_2 + r_i^{(0)})$  and  $n(\kappa_1 - \kappa_2 + r_j^{(0)})$ , for  $i, j$  in different blocks, have opposite signs. We will now check if  $n(\kappa_1 + \sigma_i \kappa_2 + r_i^{(0)}) \rightarrow \infty$ , and it suffices to lower bound  $n(|\kappa_2| - |\kappa_1| - \max_i |r_i^{(0)}|)$ . Since  $|\mu_1 - \mu_2| \geq 2|\mu_1 + \mu_2 - 1| + O_P\left(\sqrt{\frac{\rho_n \log^2 n}{n}}\right)$ ,

$$\begin{aligned} n(|\kappa_2| - |\kappa_1| - \max_i |r_i^{(0)}|) &\geq nt \left( |\mu_1 - \mu_2|(p - q) - |\mu_1 + \mu_2 - 1|(p - q) - O_P\left(\sqrt{\frac{\rho_n \log^2 n}{n}}\right) \right) \\ &\geq nct(p - q)|\mu_1 - \mu_2| = \Theta\left(|\mu_1 - \mu_2|^3 n \frac{(p - q)^2}{\rho_n}\right), \end{aligned}$$

for some constant  $c$ , so as long as  $|\mu_1 - \mu_2| \geq \left( \frac{\rho_n \log n}{n(p-q)^2} \right)^{1/3}$ .

Thus  $\kappa_1 + \sigma_i \kappa_2 + r_i^{(0)}$  is growing to infinity with an order bounded below by  $\Omega_P(\log n)$ .

If  $n(\kappa_1 + \kappa_2 + r_i^{(0)}) > 0$ , since  $\psi_i^{(1)} = g(n(\kappa_1 + \sigma_i \kappa_2) + b_i^{(0)} + nr_i^{(0)})$ , we have  $\psi^{(1)} = \mathbf{1}_{\mathcal{C}_1} + O_P(\exp(-\Omega(\log n)))$ . The case  $\kappa_1 + \kappa_2 + r_i^{(0)} < 0$  is similar.  $\square$
